# Supplementary material
Source: PubMed Central journal article supplement (PMC11028715)
Supplement: 262_2015_1763_MOESM1_ESM.pdf [file 262_2015_1763_MOESM1_ESM.pdf]

**Supplementary Table 1: List of oligonucleotide sequences used for PCR mutagenesis**

| Primer                | Sequence (5'-3')                          | Mutagenesis | Reference |
|-----------------------|-------------------------------------------|-------------|-----------|
| DH <sub>mut</sub> for | GGCTTACCTGTCCACTTGCATGGATCAATTTCCGTCGTCC  | D116H       | [18]      |
| DH <sub>mut</sub> rev | CCGGACGACGGAAAATTGATCCATGCAAGTGGACAGGTA   |             |           |
| HA <sub>mut</sub> for | GGATAACTCCAGGTACACAGCCTTCCCTGACCCAGCACTAT | H8A         | [16]      |
| HA <sub>mut</sub> rev | GCATCATAGTGCTGGGTCAGGAAGGCTGTGTACCTGGAG   |             |           |
| RA <sub>mut</sub> for | CGAGTCTAGACAGGATAACTCCGCGTACACACACTTCCTG  | R5A         | [15]      |
| RA <sub>mut</sub> rev | GGGTCAGGAAGTGTGTGTACGCGGAGTTATCCTGTCTAGA  |             |           |
| KQ <sub>mut</sub> for | GCCTGACCTCACCTGCCAAGACATCAACACATTTATTCA   | K40Q        | [15, 16]  |
| KQ <sub>mut</sub> rev | GCCATGAATAAATGTGTTGATGTCTTGGCAGGGTGAGGTC  |             |           |
| 5'-SfiI_for           | TCGTCCGCCAGCCGCC                          | -           | -         |
| Hinterhis_rev         | CCAACAGCTGGCCCTCGCAGACAG                  | -           | -         |

**Supplementary Table 2: Cytotoxicity of H22-Ang variants against stimulated HL-60 cells and hM1Φ cells**

| hCFP                             | EC <sub>50</sub> on |             | Improvement compared to H22-Ang wild type (fold change) |       |
|----------------------------------|---------------------|-------------|---------------------------------------------------------|-------|
|                                  | HL-60 (nM)          | hM1Φ (pM)   | HL-60                                                   | hM1Φ  |
| H22-Ang wild type                | 6.01 ± 1.81         | 0.89 ± 0.01 | -                                                       | -     |
| H22-Ang GRR <sub>mut</sub>       | 0.74 ± 0.33         | 0.50 ± 0.04 | 5 - 12                                                  | ≤ 2   |
| H22-Ang GRR/QG/RA <sub>mut</sub> | 1.83 ± 0.59         | 0.79 ± 0.14 | 2 - 5                                                   | -     |
| H22-Ang GRR/QG/HA <sub>mut</sub> | 1.16 ± 0.45         | 0.45 ± 0.07 | 3 - 7                                                   | 2     |
| H22-Ang GRR/QG/DH <sub>mut</sub> | 0.30 ± 0.17         | 0.32 ± 0.08 | 13 - 32                                                 | 2 - 3 |
| H22-Ang GRR/QG/KQ <sub>mut</sub> | 1.13 ± 0.35         | 0.72 ± 0.17 | 4 - 7                                                   | -     |

**Supplementary Table 3: Relevant patient data**

| Patient characteristics | Number   | Specimen condition |
|-------------------------|----------|--------------------|
| Total patient number    | 4        |                    |
| Average age             | 71 ± 17  |                    |
| Gender                  |          |                    |
| Male                    | 2        |                    |
| Female                  | 2        |                    |
| WHO subtype             |          |                    |
| CMML                    | 1        | bone marrow        |
| AML-M4                  | 2        | peripheral blood   |
| AML-M5                  | 1        | peripheral blood   |
| WBC (g/l)               | 95 ± 15  |                    |
| Monocytes (%)           | 1 - 6    |                    |
| Hemoglobin (g/l)        | 90 ± 18  |                    |
| Platelet count (g/l)    | 31 - 128 |                    |

WHO: World Health Organization, CMML: chronic myelomonocytic leukemia, AML: acute myeloid leukemia, WBC: white blood cells
